# Supplementary material
Source: PubMed Central journal article supplement (PMC2883343)
Supplement: ddq154_1.pdf [file ddq154_1.pdf]

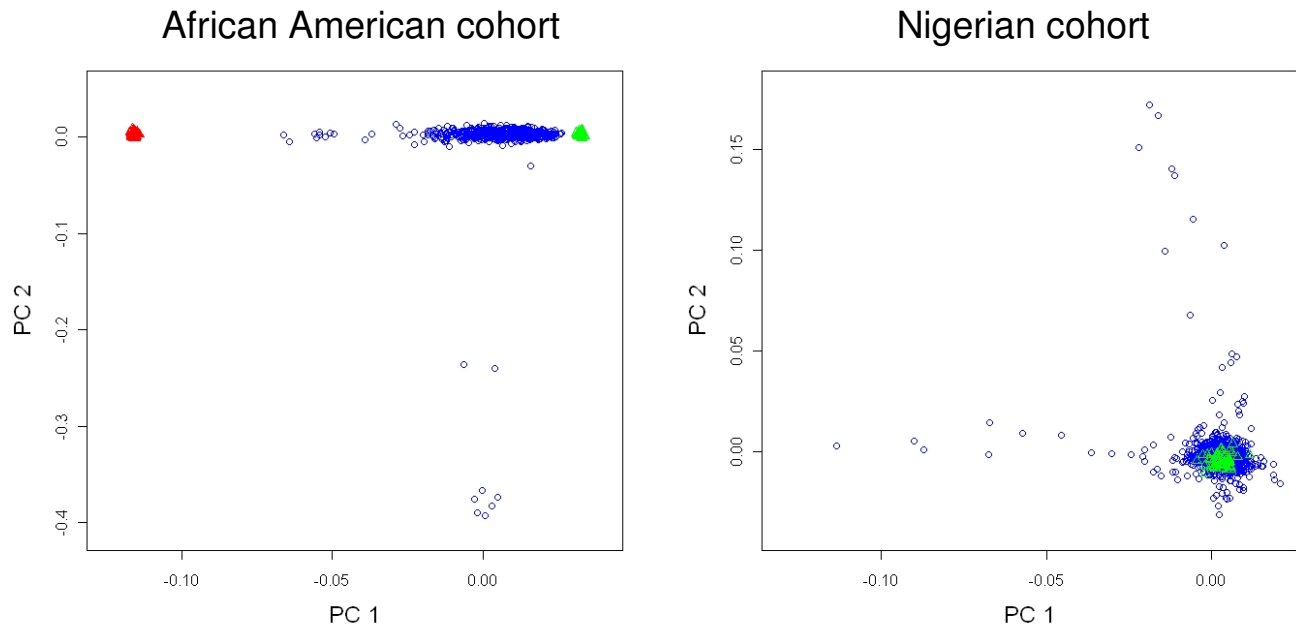

Supplemental Figure 1: Population stratification in African-American and Nigerian cohorts. HapMap individuals YRI (green) and CEU (red) were included as reference. African-Americans have a degree of admixture of African and European ancestry, while Nigerians were clustered as a single group.

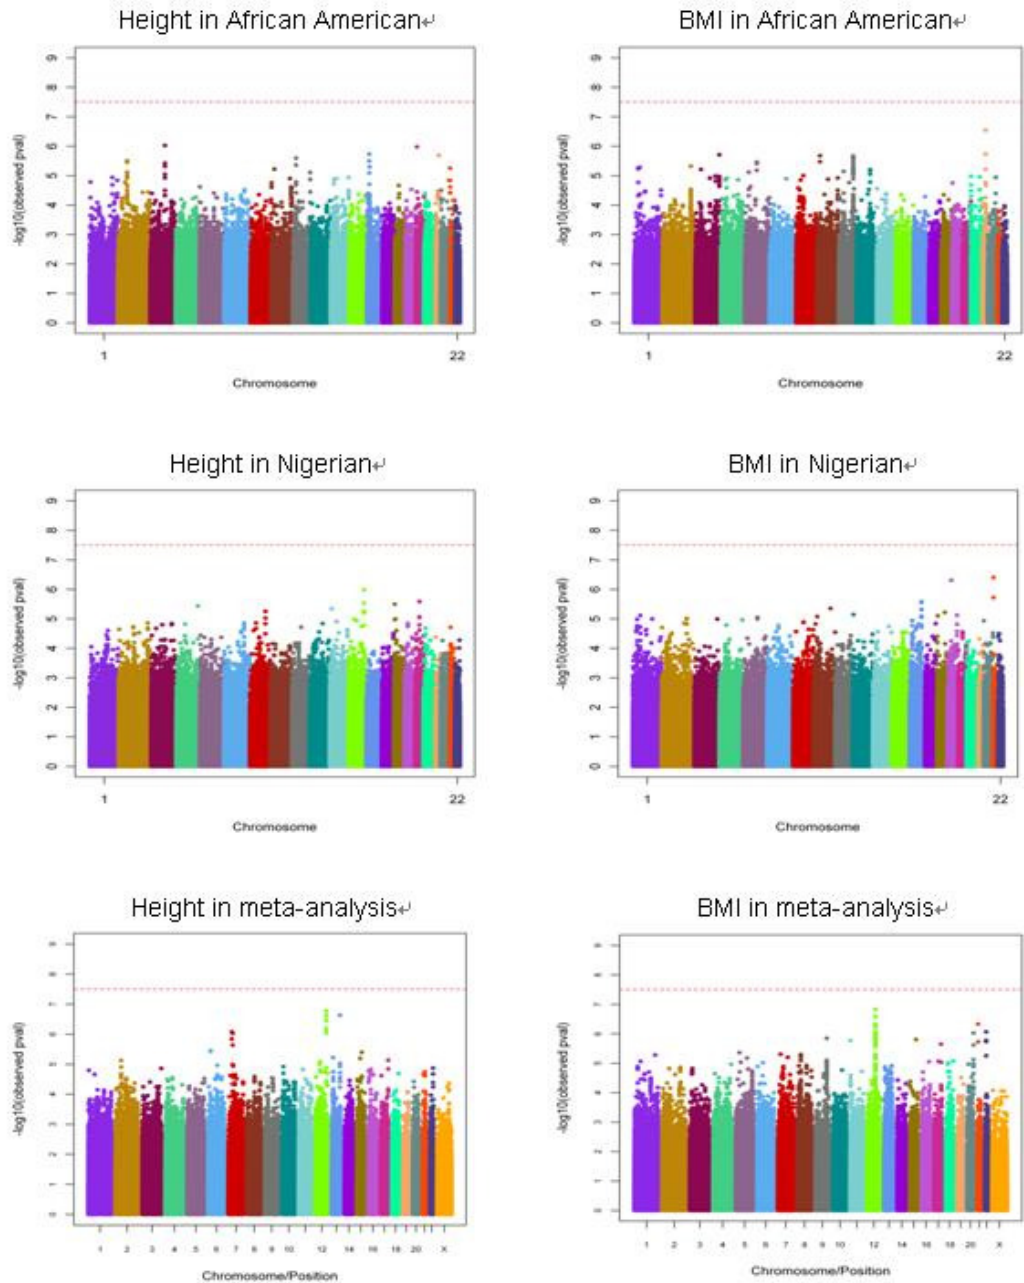

Supplemental Figure 2: Manhattan plots of GWA results in the African-American, Nigerian, and meta-analysis for height (left) and BMI (right). The dotted line signifies genome-wide significance level at  $P = 5 \times 10^{-8}$ .

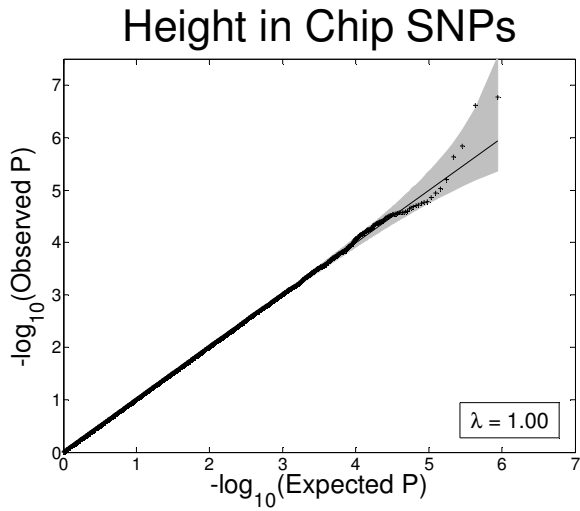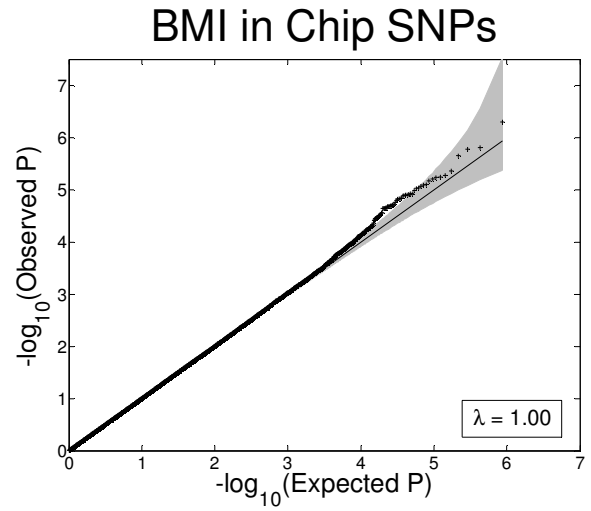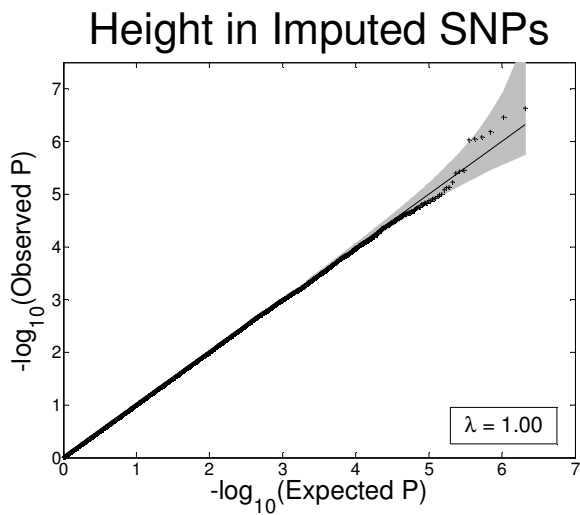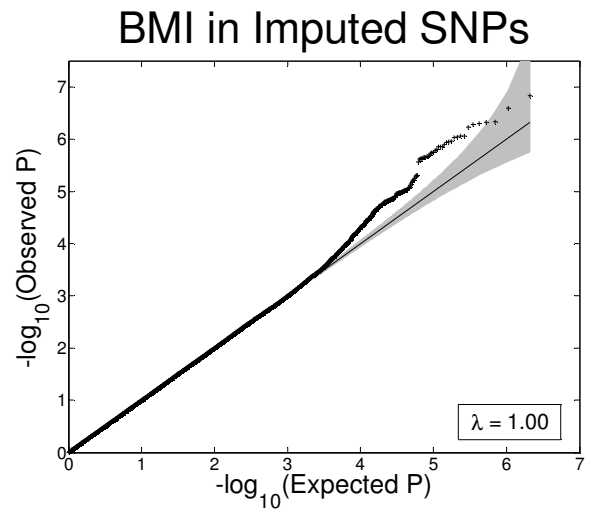

Supplemental Figure 3: QQ plots of GWA results for height and BMI using Chip SNPs only or Imputed SNPs only, after meta-analysis. The lambdas are 1.00 for both height and BMI in all cases.

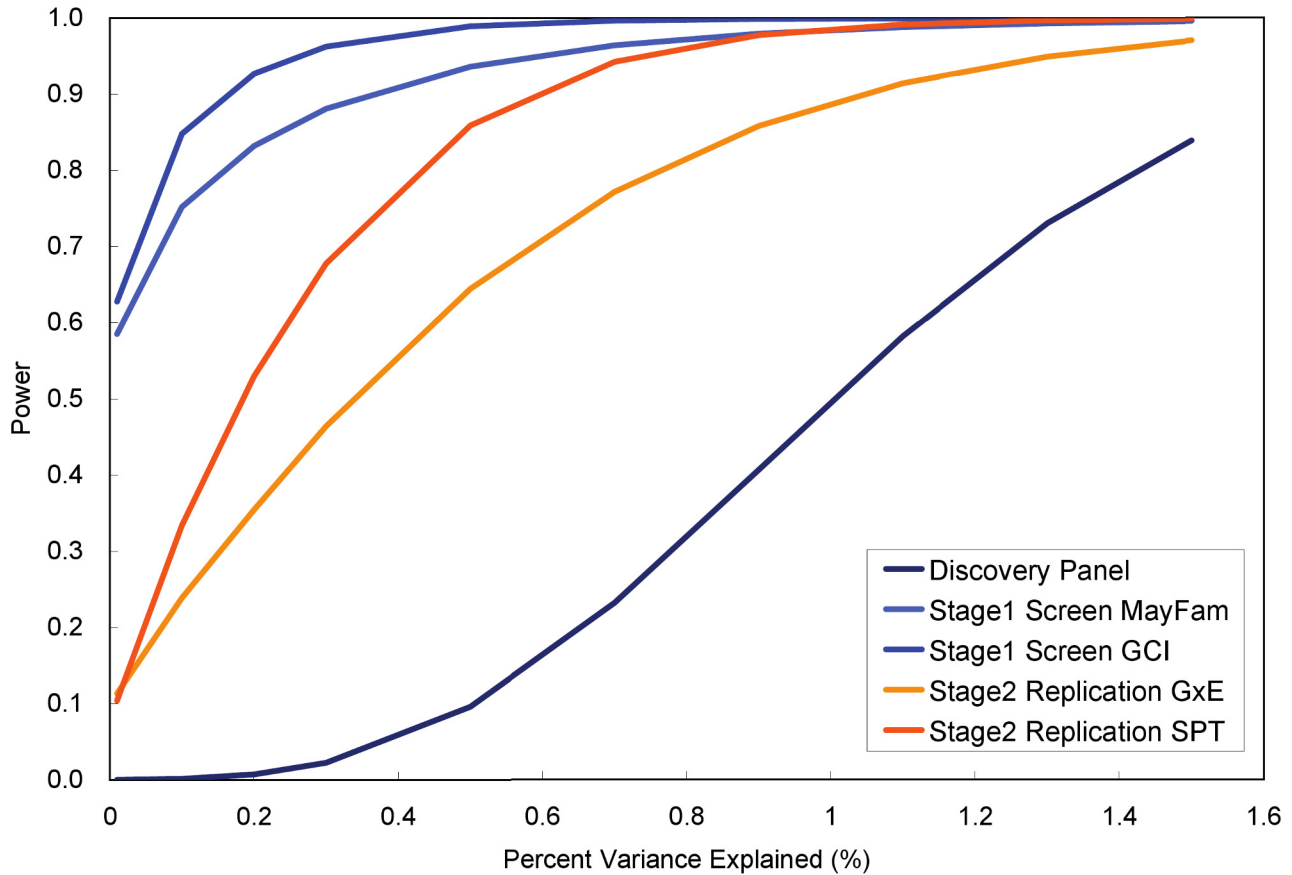

Supplemental Figure 4: Analysis of power in study design. The power was calculated over a range of effect sizes (percent variance explained) under the significance threshold ( $\alpha$ ) and effective sample size ( $N_e$ ) in each phase of the study as described in **Methods**. Power for two-tailed  $\alpha$  level at  $1 \times 10^{-5}$  was given for the GWA discovery panel; power for one-tailed  $\alpha$  level were given for the rest of the panels (0.05 for GWA panel for follow-up of previously reported loci, and 0.5 for stage 1 screens and 0.05 for stage 2 replications). The number of individuals in each panel was used as the effective sample size in calculating power (1,931 for the discovery panel, 494 for GCI, 959 for GxE, and 1478 for SPT), with the exception of Maywood Family panel. Because of the significant component of sibships in the Maywood Family panel, we took the conservative estimate of the effective sample size by counting all siblings if genotypes from both parents were available, but only

one sibling per family if not. Therefore, an effective sample size of 465 was used to calculate power, rather than the 756 participants present in the panel. GCI African-American panels for BMI, height, and Jamaican GxE panel for BMI were analyzed as dichotomous traits, while the rest were analyzed as continuous traits. For stage 1 screen GCI and stage 2 replication GxE curves, the power were calculated based on the BMI analysis (as dichotomous trait), but the curves are similar to that for height.

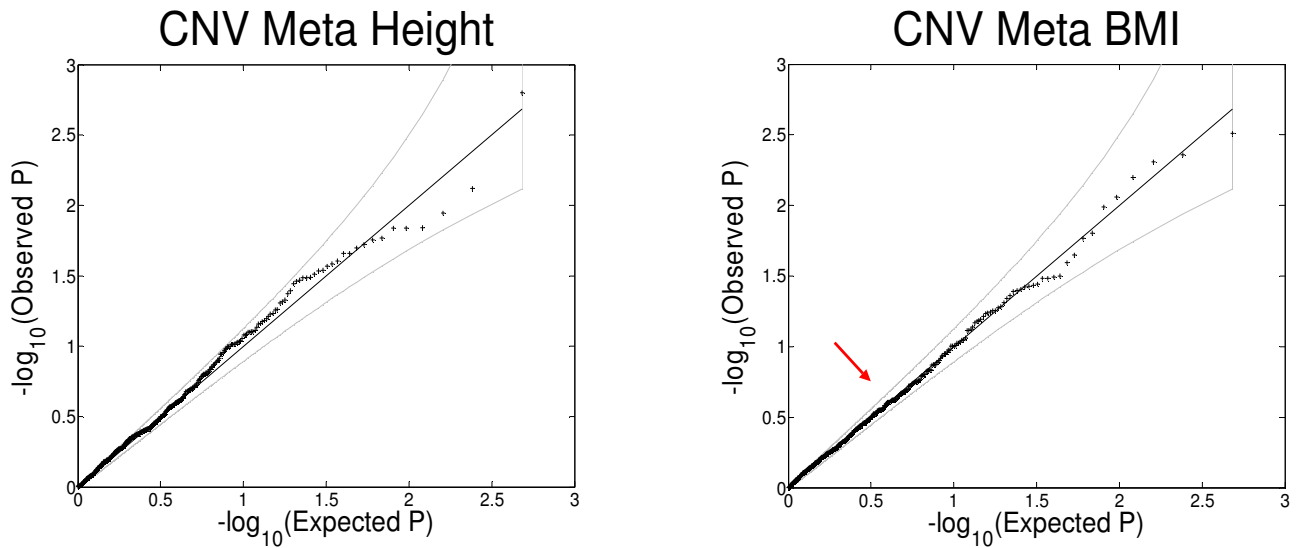

Supplemental Figure 5: QQ plots for height (left) and BMI (right) in meta-analysis of common CNV associations in African-American and Nigerian cohorts. Red arrow indicates the common deletion in the *NEGR1* locus reported to be associated with BMI. The number of CNVs tested in meta-analysis is 482. The lambdas are 1.13 and 0.95 for height and BMI, respectively. Note that lambdas are likely unstable given the relatively few markers tested.

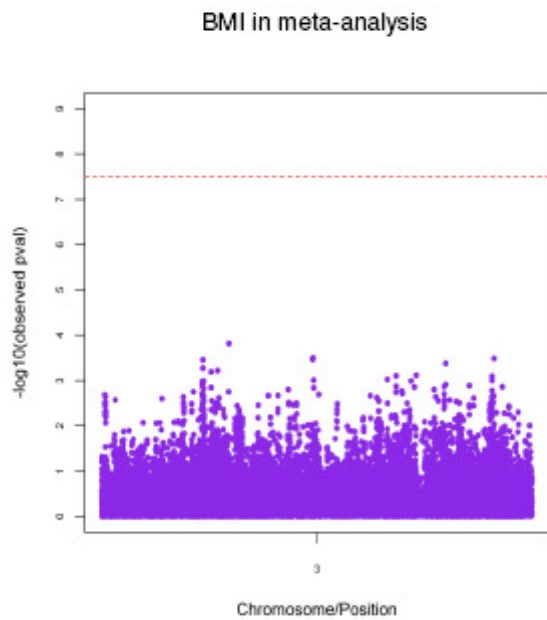

Supplemental Figure 6: Manhattan plots of GWA results in the 3q27 region after meta-analyzing the African-American and Nigerian cohorts. In total, we analyzed nearly 10,000 SNPs in this region, but none displayed compelling evidence of association to BMI, especially considering the number of SNPs we examined in this region. The SNP in 3q27 with the lowest combined  $P$  value is rs11927908 ( $P = 1.5 \times 10^{-4}$ ), in the gene *SPATA16*.

Supplement Table 1: Stage 1 replication results in two independent cohorts of African-Americans for SNPs selected for having  $P < 1 \times 10^{-5}$  in GWA discovery phase of the study. All SNPs followed up were listed. Genes are within 50 kb upstream and downstream of the index SNP. A1 denotes reference allele with respect to which the effect or odds ratio (OR) is given. P\* denotes one-tailed p-value. Notes column records if a SNP was genotyped in stage 1 due to its being in high LD ( $r^2 > 0.8$ ) with a SNP targeted for follow-up to guard against failed genotyping (proxy), but do not represent independent signals. Note that for one of the top height associated SNP, rs4619 is a non-synonymous SNP in *IGFBP1* and near *IGFBP3*, which are potential biological candidates. As such, three additional SNPs in high LD with  $P < 10^{-4}$  in the GWA panels were also genotyped in replication (rs1496496, rs1065780, and rs13223993), though they did not satisfy the two conditions described in **Methods** for criteria of follow up.

|               |            | Maywood Family     |    |        |       | GCI AA           |       |       |
|---------------|------------|--------------------|----|--------|-------|------------------|-------|-------|
| <b>Height</b> |            |                    |    |        |       |                  |       |       |
| Chr           | SNP        | Genes              | A1 | Effect | P*    | Effect           | P*    | Notes |
| 2             | rs6746641  |                    | C  | 0.078  | 0.579 | N/A              |       |       |
| 6             | rs734015   | C6orf32            | G  | -0.092 | 0.600 | 1.08 (0.84-1.39) | 0.282 |       |
| 6             | rs2817723  | C6orf32            | C  | 0.036  | 0.465 | 1.08 (0.83-1.41) | 0.278 |       |
| 7             | rs6942726  | ELMO1              | C  | 0.022  | 0.520 | 0.94 (0.69-1.27) | 0.335 |       |
| 7             | rs1065780  | IGFBP1, IGFBP3     | A  | -0.510 | 0.917 | 0.98 (0.75-1.26) | 0.576 | proxy |
| 7             | rs4619     | IGFBP1, IGFBP3     | G  | N/A    |       | 1.06 (0.82-1.37) | 0.333 |       |
| 7             | rs1496496  | IGFBP1, IGFBP3     | G  | -0.415 | 0.873 | 1.13 (0.88-1.46) | 0.174 | proxy |
| 7             | rs13223993 | IGFBP1, IGFBP3     | A  | -0.264 | 0.766 | 1.03 (0.80-1.33) | 0.404 | proxy |
| 12            | rs6582380  | GLT8D3             | A  | 0.837  | 0.754 | 1.23 (0.53-2.88) | 0.685 |       |
| 12            | rs11169806 | BIN2, ELA1, GALNT6 | A  | 0.232  | 0.267 | 0.90 (0.69-1.18) | 0.773 |       |
| 12            | rs1463833  |                    | G  | 0.259  | 0.240 | 0.87 (0.67-1.13) | 0.851 |       |
| 12            | rs1498759  |                    | T  | N/A    |       | 0.93 (0.69-1.25) | 0.688 |       |
| 13            | rs1359634  |                    | C  | N/A    |       | N/A              |       |       |
| 13            | rs323425   |                    | T  | 0.439  | 0.838 | 0.97 (0.71-1.32) | 0.427 |       |
| 15            | rs10444801 |                    | G  | -0.022 | 0.480 | 1.41(1.09-1.82)  | 0.996 |       |
| 15            | rs2994     | THSD4              | G  | 0.154  | 0.650 | 0.92 (0.70-1.21) | 0.278 |       |
| 17            | rs12603456 | TBCD, B3GNTL1      | T  | N/A    |       | 1.09 (0.83-1.42) | 0.272 |       |
| <b>BMI</b>    |            |                    |    |        |       |                  |       |       |
| Chr           | SNP        | Genes              | A1 | Effect | P*    | OR (95% CI)      | P*    | Notes |



|    |            |                     |   |        |       |                  |       |       |
|----|------------|---------------------|---|--------|-------|------------------|-------|-------|
| 1  | rs1395246  | PGM1                | C | 0.070  | 0.271 | 0.78 (0.42-1.43) | 0.791 |       |
| 1  | rs12063584 | USH2A               | G | -0.014 | 0.556 | 1.23 (0.74-2.04) | 0.217 |       |
| 5  | rs16903085 |                     | C | 0.049  | 0.379 | 0.69 (0.29-1.65) | 0.799 |       |
| 5  | rs6892149  | PARP8               | C | 0.046  | 0.732 | 0.66 (0.46-0.93) | 0.009 |       |
| 5  | rs17136138 |                     | C | -0.204 | 0.951 | 0.77 (0.44-1.35) | 0.820 |       |
| 6  | rs973089   | DST                 | T | 0.069  | 0.889 | 0.97 (0.73-1.29) | 0.405 |       |
| 7  | rs739750   | C7orf31, NPVF       | A | 0.062  | 0.170 | 1.13 (0.81-1.57) | 0.245 |       |
| 7  | rs11772003 | EMID2               | G | -0.075 | 0.885 | 0.95 (0.70-1.30) | 0.624 |       |
| 8  | rs7823476  |                     | A | N/A    |       | 0.96 (0.71-1.30) | 0.611 |       |
| 9  | rs10981043 | C9orf84             | A | 0.049  | 0.748 | 0.86 (0.58-1.26) | 0.218 |       |
| 11 | rs4323851  | BRSK2               | G | N/A    |       | 0.86 (0.62-1.20) | 0.811 |       |
| 12 | rs4370996  | CCDC59, C12orf26    | A | N/A    |       | 0.82 (0.55-1.21) | 0.157 | proxy |
| 12 | rs2401027  | CCDC59, C12orf26    | T | 0.055  | 0.778 | 0.83 (0.57-1.21) | 0.163 |       |
| 15 | rs6495634  |                     | T | 0.033  | 0.629 | 1.01 (0.6-1.70)  | 0.515 |       |
| 16 | rs6564329  | CNTNAP4             | G | 0.113  | 0.097 | 0.91 (0.55-1.51) | 0.639 |       |
| 17 | rs492256   | C17orf77, CD300E    | T | -0.188 | 0.007 | 1.02 (0.67-1.56) | 0.536 |       |
| 18 | rs7233501  |                     | A | -0.014 | 0.418 | 0.78 (0.55-1.10) | 0.077 |       |
| 20 | rs3003172  | OPRL1, NPBWR2, MYT1 | G | -0.124 | 0.018 | 1.02 (0.75-1.37) | 0.540 |       |
| 21 | rs415277   |                     | C | 0.060  | 0.177 | 1.19 (0.84-1.67) | 0.162 |       |
| 21 | rs451387   |                     | C | -0.069 | 0.828 | 1.02 (0.68-1.54) | 0.459 |       |
| 22 | rs9608641  |                     | A | 0.051  | 0.253 | 0.83 (0.56-1.23) | 0.820 |       |

Supplement Table 2: Stage 1 replication results in two independent cohorts of African-Americans for SNPs followed up for being a reported European association and showed  $P < 0.05$  in the GWA discovery phase of this study. All SNPs genotyped were listed. Genes are within 50 kb upstreams and downstreams of the index SNP. A1 denotes reference allele with respect to which the effect or odds ratio (OR) is given. P\* denotes one-tailed p-value. Notes column records if a SNP was genotyped in stage 1 due to its being in high LD ( $r^2 > 0.8$ ) with a SNP targeted for follow-up to guard against failed genotyping (proxy), but do not represent independent signals, or was the exact SNP reported previously in literature (European hit).

|               |            | Maywood Family      |    |        |       | GCI AA           |       |                       |
|---------------|------------|---------------------|----|--------|-------|------------------|-------|-----------------------|
| <b>Height</b> |            |                     |    |        |       |                  |       |                       |
| Chr           | SNP        | Genes               | A1 | Effect | P*    | Effect           | P*    | Notes                 |
| 2             | rs10445823 | CCDC108, IHH, NHEJ1 | C  | -0.877 | 0.008 | 0.97 (0.72-1.25) | 0.402 |                       |
| 2             | rs13398523 | CCDC108, IHH, NHEJ1 | T  | -0.858 | 0.010 | 0.95 (0.74-1.22) | 0.340 | proxy                 |
| 3             | rs7619451  | ANAPC13, CEP63      | T  | N/A    |       | N/A              |       |                       |
| 3             | rs11919350 | ANAPC13, CEP63      | C  | -0.238 | 0.261 | 1.29 (1.00-1.68) | 0.974 | proxy                 |
| 6             | rs11964049 | BMP6                | T  | -0.394 | 0.819 | 0.94 (0.70-1.27) | 0.648 | proxy                 |
| 6             | rs7769495  | BMP6                | G  | -0.458 | 0.860 | 0.91 (0.69-1.21) | 0.735 |                       |
| 6             | rs12198986 | BMP6                | A  | -0.515 | 0.863 | 1.07 (0.78-1.45) | 0.344 | European hit<br>proxy |
| 13            | rs201762   | DLEU7               | G  | -1.297 | 0.044 | 0.96 (0.58-1.60) | 0.438 |                       |
| 18            | rs4800455  | CABLES1             | A  | 0.422  | 0.877 | 0.89 (0.69-1.15) | 0.190 |                       |
| 18            | rs7506861  | DYM                 | G  | 0.597  | 0.068 | 1.17 (0.86-1.59) | 0.153 |                       |
| <b>BMI</b>    |            |                     |    |        |       |                  |       |                       |
| Chr           | SNP        | Genes               | A1 | Effect | P*    | OR (95% CI)      | P*    | Notes                 |
| 3             | rs7635103  | ETV5, DGKG          | A  | 0.033  | 0.283 | 0.91 (0.69-1.21) | 0.744 |                       |
| 18            | rs1539952  | MC4R                | G  | 0.112  | 0.040 | 1.24 (0.89-1.74) | 0.101 | proxy                 |
| 18            | rs6567160  | MC4R                | C  | 0.134  | 0.024 | 1.14 (0.81-1.63) | 0.227 |                       |

Supplemental Table 3: Genic rare CNV (frequency < 5%) burden analysis. Analysis conducted as described for Table 6, but restricting to only rare CNV segments within 20 kb of known genes (RefSeq gene list, hg18 coordinates, +/- 20kb around the largest transcript per gene).

| Cohort                            | Group              | Sample (N) | NSEG (N) | RATE  | Total Span (Kb) | Avg Span (Kb) |
|-----------------------------------|--------------------|------------|----------|-------|-----------------|---------------|
| African-Americans                 | Case               | 190        | 1,528    | 8.042 | 549.7           | 68.8          |
|                                   | Control            | 435        | 3,558    | 8.179 | 673.5           | 83.7          |
|                                   | Empirical <i>P</i> |            |          | 0.654 | 0.0158          | 0.0116        |
| Nigerians                         | Case               | 291        | 2,174    | 7.471 | 544.6           | 75.01         |
|                                   | Control            | 585        | 4,573    | 7.817 | 588.1           | 77.6          |
|                                   | Empirical <i>P</i> |            |          | 0.350 | 0.316           | 0.542         |
| Meta-analyzed <i>P</i>            |                    |            |          | 0.315 | 0.020           | 0.036         |
| Europeans /<br>European-Americans | Case               | 604        | 4,097    | 6.783 | 693.4           | 99.44         |
|                                   | Control            | 1,204      | 8,042    | 6.679 | 623.6           | 93.65         |
|                                   | Empirical <i>P</i> |            |          | 0.572 | 0.0326          | 0.192         |

Supplemental Table 4: Global rare CNV burden analysis stratified by sex. Analysis conducted as described for Table 6. Only analysis after combining the African-American and Nigerian cohorts are shown here.

| Sex                    | Group              | Sample (N) | NSEG (N) | RATE  | Total Span (Kb) | Avg Span (Kb) |
|------------------------|--------------------|------------|----------|-------|-----------------|---------------|
| Male                   | Case               | 203        | 2,343    | 11.54 | 695.6           | 61.23         |
|                        | Control            | 576        | 6,931    | 12.03 | 824.8           | 71.6          |
|                        | Empirical <i>P</i> |            |          | 0.330 | 0.0208          | 0.0198        |
| Female                 | Case               | 278        | 3,211    | 11.55 | 723.8           | 65.1          |
|                        | Control            | 444        | 5,377    | 12.11 | 855.2           | 72.05         |
|                        | Empirical <i>P</i> |            |          | 0.185 | 0.0109          | 0.0749        |
| Meta-analyzed <i>P</i> |                    |            |          | 0.105 | 0.00060         | 0.0036        |
